# Supplementary material
Source: ML conference proceedings conference paper supplement (https://proceedings.mlr.press/v32/ben-david14.html)
Supplement: Supplementary file 1 [file ben-david14-supp.zip]

# Supplementary Material for “Clustering in the Presence of Background Noise”

Shai Ben-David

SHAI@CS.UWATERLOO.CA

David R. Cheriton School of Computer Science, University of Waterloo, Waterloo, ON N2L 3G1 CANADA

Nika Haghtalab

NIKA@CMU.EDU

Computer Science Department, Carnegie Mellon University, Pittsburgh, PA 15213 USA

## Proof of Theorems and Lemmas

**Lemma 1.** *Given a  $(k, g)$ -centroid algorithm  $\mathcal{A}$  and parameter  $\delta$ , let  $\mathcal{A}' = RT_\delta(\mathcal{A})$ . For any  $\mathcal{I} \subseteq \mathcal{X}$ , such that for all  $y \in \mathcal{I}$ ,  $d(y, \mu'(y)) \leq \delta$ ,  $\mathcal{I}$  is  $g(\delta)|\mathcal{X} \setminus \mathcal{I}|$ -cost-robust to  $\mathcal{X} \setminus \mathcal{I}$  with respect to  $RT_\delta(\mathcal{A})$  for the  $\Lambda_d^g$  (cost) function.*

*Proof.* If  $d(y, \mu'(y)) \leq \delta$ , then  $y$  is not in the noise cluster. Therefore, there is a cluster  $C^* \in \mathcal{C}$ , such that  $C^* \subseteq \mathcal{X} \setminus \mathcal{I}$ , and for any  $C' \neq C^*$ ,

$$\Lambda_d^g(C') \leq \Lambda_d^g(C' \cap \mathcal{I}) + |C' \setminus \mathcal{I}| \cdot g(\delta)$$

Therefore,  $\mathcal{I}$  is  $g(\delta)|\mathcal{X} \setminus \mathcal{I}|$ -cost-robust to  $|\mathcal{X} \setminus \mathcal{I}|$  with respect to  $RT_\delta(\mathcal{A})$  for the  $\Lambda_d^g$  cost function.  $\square$

**Lemma 3.** *Let  $\mathcal{A}$  be the  $(k, g)$ -centroid algorithm. For any  $\mathcal{I}$ , if it can be covered with a  $(\rho_1, \rho_2)$ -balanced set of  $k$  balls, called  $\mathcal{B}$ , where each ball has radius  $r$  and the centers of two different balls are at least  $\nu > 4r + 2g^{-1}(\frac{\rho_1 + \rho_2}{\rho_1}g(r))$  apart, then  $\mathcal{A}(\mathcal{I}) = \mathcal{B}$ .*

*Proof.* Let  $\mathcal{B} = \{B_1, \dots, B_k\}$  and for  $i \in [k]$  let  $b_i$  represent the center of  $B_i$  and  $D_i$  represent a ball of radius  $\frac{\nu}{2} - r$  centered at  $b_i$ . Let  $\mathcal{A}(\mathcal{X}) = \mathcal{C}$  with centers  $\mu_1, \dots, \mu_k$ . Let  $\mathcal{D}_1 = \{D_i \mid D_i \text{ does not cover any } \mu_j\}$  and  $\mathcal{D}_2 = \{D_i \mid D_i \text{ covers more than one } \mu_j\}$ . Since  $D_1, \dots, D_k$  are pairwise disjoint,  $|\mathcal{D}_1| \geq |\mathcal{D}_2|$ . Assume in search of a contradiction that  $\mathcal{D}_1 \neq \emptyset$ . For any  $D_i \in \mathcal{D}_1$ , for all  $y \in D_i$ ,  $d(y, \mu(y)) \geq \frac{\nu}{2} - 2r$ . Consider the following set of  $\mu_1'', \dots, \mu_k''$ : If  $D_j$  includes exactly one center,  $\mu_i$ , then let  $\mu_j'' = \mu_i$ , otherwise  $\mu_j'' = b_j$ .

$$\begin{aligned} \Lambda_{\mathcal{I}, d}^g(\mu_1'', \dots, \mu_k'') &\leq \Lambda_{\mathcal{I}, d}^g(\mu_1, \dots, \mu_k) \\ &+ \sum_{D_i \in \mathcal{D}_1} \sum_{y \in B_i} [g(d(y, \mu''(y))) - g(d(y, \mu(y)))] \\ &+ \sum_{D_i \in \mathcal{D}_2} \sum_{y \in B_i} [g(d(y, \mu''(y))) - g(d(y, \mu(y)))] \end{aligned}$$

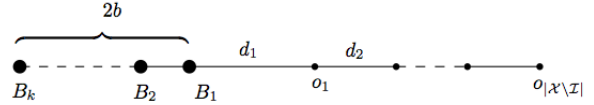

Figure 1. Structure of a data set that is not robust w.r.t  $RI_p(\mathcal{A})$ .

$$\begin{aligned} &\leq \Lambda_{\mathcal{I}, d}^g(\mu_1, \dots, \mu_k) + \sum_{D_i \in \mathcal{D}_1} |B_i| \left( g(r) - g\left(\frac{\nu}{2} - 2r\right) \right) \\ &+ \sum_{D_i \in \mathcal{D}_2} |B_i| g(r) \\ &\leq \Lambda_{\mathcal{I}, d}^g(\mu_1, \dots, \mu_k) + \rho_1 |\mathcal{D}_1| |\mathcal{I}| \left( g(r) - g\left(\frac{\nu}{2} - 2r\right) \right) \\ &+ \rho_2 |\mathcal{D}_2| |\mathcal{I}| g(r) \\ &\leq \Lambda_{\mathcal{I}, d}^g(\mu_1, \dots, \mu_k) \\ &+ |\mathcal{D}_1| |\mathcal{I}| \left( (\rho_1 + \rho_2) g(r) - \rho_1 g\left(\frac{\nu}{2} - 2r\right) \right) \\ &< \Lambda_{\mathcal{I}, d}^g(\mu_1, \dots, \mu_k) \end{aligned}$$

This forms a contradiction, so without loss of generality every  $D_i$  covers a center  $\mu_i$ . For  $i \neq j$  and for all  $y \in B_i$ ,  $d(y, \mu_i) \leq \frac{\nu}{2} < d(y, \mu_j)$ . Therefore,  $\mathcal{A}(\mathcal{I}) = \mathcal{B}$ .  $\square$

**Theorem 6.** *Let  $\mathcal{A}$  be the  $k$ -means algorithm. For any  $r, \lambda > 0$ , there exists  $\mathcal{X}$  and  $\mathcal{I} \subseteq \mathcal{X}$ , such that  $\text{rad}(\mathcal{I}) \leq r$ ,  $\mathcal{I}$  can be covered with  $k$  balls of arbitrarily small radii, and  $\mathcal{X}$  has signal-to-noise ratio of  $\frac{|\mathcal{I}|}{|\mathcal{X} \setminus \mathcal{I}|} \geq \lambda$ . But, for any  $p < |\mathcal{X} \setminus \mathcal{I}|$ ,  $\mathcal{I}$  is not  $(1 - \frac{1}{k})$ -robust with respect to  $RI_p(\mathcal{A})$ .*

*Proof.* We repeat the construction from Theorem 2 and Figure 1 with  $\alpha = 2r$ . Let  $d_1 = 4r(\frac{\lambda}{\lambda+1}|\mathcal{X}| + 1)$  and  $d_2 = 2(d_1 + 2r) + 1$ . For  $i \in [k]$ , let  $B_i$  denote a set with radius 0, such that  $|B_i| \geq \frac{\lambda}{k(\lambda+1)}|\mathcal{X}|$ . Let  $B_1, \dots, B_k$  be evenly placed on a line of length  $2r$ . For,  $i \in \left[\left\lfloor \frac{|\mathcal{X}|}{\lambda+1} \right\rfloor\right]$ , let  $o_i$  be a point on the line that connects  $B_1, \dots, B_k$ , such that  $d(o_1, B_1) = d_1$  and  $d(o_i, o_{i+1}) = d_2$  (see Figure 1). Let  $\mathcal{I} = \bigcup_{i \in [k]} B_i$  and  $\mathcal{X} = \mathcal{I} \cup \{o_1, \dots, o_{|\mathcal{X}|/(\lambda+1)}\}$ . Note that  $\mathcal{X}$  and  $\mathcal{I}$  are chosen such that  $\frac{|\mathcal{I}|}{|\mathcal{X} \setminus \mathcal{I}|} \geq \lambda$ .

Similar to Theorem 2, we have that for all  $y \in \mathcal{I}$ ,  $d(y, \mu(y)) > 2r$ . Since the clusters in any centroid-based clustering are convex, the center of the cluster containing any  $B_i$  is to the right of  $\mathcal{I}$  (see Figure 1). Therefore,  $B_1, \dots, B_k$  are all in one cluster of  $RI_p(\mathcal{A})(\mathcal{X})$ . Each  $B_i$  forms a unique cluster in  $\mathcal{A}(\mathcal{I})$ . Therefore,

$$\begin{aligned} \Delta(\mathcal{A}(\mathcal{I}), \mathcal{A}'(\mathcal{X})|\mathcal{I}) &\geq 1 - \frac{\sum_{i \in [k]} \binom{|B_i|}{2}}{\binom{|\mathcal{I}|}{2}} \\ &\geq 1 - \frac{k \binom{\frac{|\mathcal{I}|}{k}}{2}}{\binom{|\mathcal{I}|}{2}} \\ &\geq 1 - \frac{1}{k} \end{aligned}$$

$\mathcal{I}$  is not  $(1 - \frac{1}{k})$ -robust to  $\mathcal{X} \setminus \mathcal{I}$  with respect to  $RI_p(\mathcal{A})$ .  $\square$
